# Supplementary material
Source: HighWire-hosted journal article supplement (http://jmg.bmjjournals.com/highwire/filestream/160496/field_highwire_adjunct_files/2/Table_S2.pdf)
Supplement: Table_S2.pdf [file Table_S2.pdf]

**Table S2.** Individual pulmonary measures in *FGF10* heterozygotes.

| Patient        | age (yr)  | height (cm) | weight (kg) | Sex | IVC         | IVC LLN     | IVCpred     | IVC%pred   | FEV1        | FEV1 LLN    | FEV1pred    | FEV1%pred  | FEV1 after Terbutalin† | FEV1/IVC    | FEV1/IVC LLN | FEV1/IVCpred | TLC         | TLC LLN     | TLCpred     | FEV1/IVC > LLN | IVC > LLN  | TLC > LLN  | Phenotype          | ATS/ERS 2005      | GOLD 2006 |
|----------------|-----------|-------------|-------------|-----|-------------|-------------|-------------|------------|-------------|-------------|-------------|------------|------------------------|-------------|--------------|--------------|-------------|-------------|-------------|----------------|------------|------------|--------------------|-------------------|-----------|
| IA37           | 69        | 180         | 98          | m   | 2.86        | 3.46        | 4.60        | 58%        | 1.90        | 2.48        | 3.37        | 58%        | 4.3%                   | 0.66        | 0.62         | 0.75         | 6.05        | 6.11        | 7.37        | Yes            | No         | No         | Restriction        | no                | mild      |
| KS68           | 37        | 173         | 58          | f   | 4.21        | 3.57        | 4.37        | 101%       | 2.54        | 2.90        | 3.57        | 74%        | 6.4%                   | 0.60        | 0.73         | 0.83         | 6.76        | 4.99        | 5.86        | No             | Yes        | Yes        | Obstruction        | mild              | moderate  |
| MS88           | 17        | 173         | 64          | f   | 4.08        | 3.48        | 4.23        | 88%        | 2.48        | 3.03        | 3.71        | 63%        | 6.4%                   | 0.61        | 0.77         | 0.88         | 5.46        | 4.99        | 5.86        | No             | Yes        | Yes        | Obstruction        | moderate          | moderate  |
| MS90           | 15        | 165         | 61          | f   | 3.52        | 3.01        | 3.66        | 81%        | 2.71        | 2.64        | 3.24        | 73%        | 1.6%                   | 0.77        | 0.77         | 0.88         | 4.95        | 4.42        | 5.29        | No             | Yes        | Yes        | Obstruction        | mild              | no        |
| MS92           | 13        | 159         | 48          | f   | 2.69        | 2.63        | 3.22        | 65%        | 1.76        | 2.30        | 2.84        | 49%        | 4.2%                   | 0.65        | 0.78         | 0.89         | 3.62        | 3.99        | 4.87        | No             | Yes        | No         | Obstruction        | moderate          | moderate  |
| PA74           | 32        | 183         | 71          | m   | 5.65        | 4.83        | 5.85        | 95%        | 3.81        | 3.83        | 4.73        | 82%        | 3.0%                   | 0.67        | 0.71         | 0.81         | 8.34        | 6.34        | 7.61        | No             | Yes        | Yes        | Obstruction        | mild              | mild      |
| GA80           | 26        | 180         | 82          | m   | 5.53        | 4.75        | 5.73        | 94%        | 3.93        | 3.83        | 4.71        | 83%        | 7.4%                   | 0.71        | 0.72         | 0.83         | 6.77        | 6.11        | 7.37        | No             | Yes        | Yes        | Obstruction        | mild              | no        |
| JA48           | 58        | 178         | 96          | m   | 4.36        | 3.76        | 4.83        | 86%        | 2.30        | 2.80        | 3.66        | 64%        | -1.7%                  | 0.53        | 0.66         | 0.77         | 7.55        | 5.95        | 7.21        | No             | Yes        | Yes        | Obstruction        | moderate          | moderate  |
| LA41           | 65        | 182         | 78          | m   | 3.35        | 3.71        | 4.88        | 65%        | 2.10        | 2.69        | 3.61        | 60%        | 4.9%                   | 0.63        | 0.63         | 0.75         | 5.11        | 6.27        | 7.53        | No             | No         | No         | Obstruction        | moderately severe | moderate  |
| BA45           | 62        | 185         | 108         | m   | 4.51        | 4.00        | 5.20        | 83%        | 2.92        | 2.92        | 3.88        | 78%        | -0.8%                  | 0.65        | 0.64         | 0.76         | 7.63        | 6.50        | 7.77        | Yes            | Yes        | Yes        | Normal             | no                | moderate  |
| CS88           | 18        | 162         | 61          | f   | 3.05        | 3.00        | 3.65        | 73%        | 2.04        | 2.63        | 3.22        | 58%        | 5.4%                   | 0.67        | 0.77         | 0.88         | 4.30        | 4.21        | 5.08        | No             | Yes        | Yes        | Obstruction        | moderate          | moderate  |
| CS54           | 53        | 170         | 61          | f   | 3.43        | 3.01        | 3.81        | 93%        | 2.19        | 2.33        | 2.97        | 75%        | 3.8%                   | 0.64        | 0.69         | 0.79         | 5.56        | 4.78        | 5.65        | No             | Yes        | Yes        | Obstruction        | mild              | moderate  |
| <b>Average</b> | <b>39</b> | <b>174</b>  | <b>74</b>   |     | <b>3.94</b> | <b>3.60</b> | <b>4.50</b> | <b>82%</b> | <b>2.56</b> | <b>2.87</b> | <b>3.63</b> | <b>68%</b> | <b>3.7%</b>            | <b>0.65</b> | <b>0.71</b>  | <b>0.82</b>  | <b>6.01</b> | <b>5.39</b> | <b>6.46</b> | <b>No</b>      | <b>Yes</b> | <b>Yes</b> | <b>Obstruction</b> |                   |           |
| <b>SD</b>      | <b>21</b> | <b>9</b>    | <b>19</b>   |     | <b>0.97</b> | <b>0.68</b> | <b>0.84</b> | <b>14%</b> | <b>0.70</b> | <b>0.50</b> | <b>0.60</b> | <b>11%</b> | <b>2.8%</b>            | <b>0.06</b> | <b>0.06</b>  | <b>0.06</b>  | <b>1.43</b> | <b>0.92</b> | <b>1.11</b> |                |            |            |                    |                   |           |
